# Supplementary material for: Hidden female physiological resistance to male accessory gland substances in a simultaneous hermaphrodite
Source: Oxford University Press journal article supplement (doi:10.1242/jeb.149963), 2017-01-01
Supplement: jeb149963supp.pdf [file jeb149963supp.pdf]

**Table S1. Mean length ( $\pm$  s.d.) of spermatophore-producing and -receiving organs of *C. aspersum* and *E. vermiculata*.** These organs were measured for both species ( $N=10$  for each) with a digital calliper by using specimens used in this study preserved in 70% Ethanol.

|                       | Spermatophore-producing organs (cm) |               |               | Spermatophore-receiving organ (cm) |
|-----------------------|-------------------------------------|---------------|---------------|------------------------------------|
|                       | Penis                               | Epiphallus    | Flagellum     | Diverticulum                       |
| <i>E. vermiculata</i> | 0.8 $\pm$ 0.1                       | 0.8 $\pm$ 0.1 | 2.1 $\pm$ 0.2 | 10.5 $\pm$ 1.0                     |
| <i>C. aspersum</i>    | 0.8 $\pm$ 0.2                       | 1.2 $\pm$ 0.2 | 9.6 $\pm$ 0.9 | 5.0 $\pm$ 0.9                      |

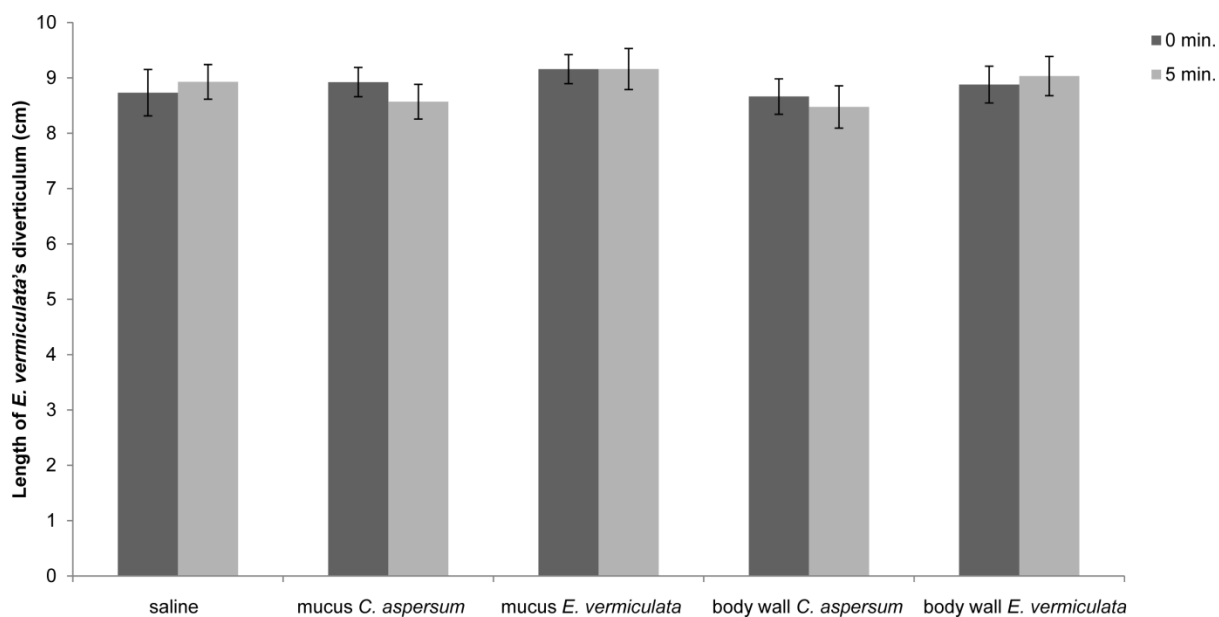

**Fig. S1. Mean length ( $\pm$  s.e.) of *E. vermiculata*'s diverticulum in response to different substances.** The length was measured before (0 min.) and after (5 min.) the addition of the five tested substances. Significance between time points was not found.
